# Supplementary material for: Selective photocatalytic CO2 reduction in aerobic environment by microporous Pd-porphyrin-based polymers coated hollow TiO2
Source: PubMed Central journal article supplement (PMC8930982; doi:10.1038/s41467-022-29102-0), 2022-03-17
Supplement: 41467_2022_29102_MOESM1_ESM.pdf [file 41467_2022_29102_MOESM1_ESM.pdf]

## **Supplementary Information**

Selective photocatalytic CO<sub>2</sub> reduction in aerobic environment by microporous Pd-porphyrin-based polymers coated hollow TiO<sub>2</sub>

Ma et al.

## Table of Contents

|                                                                                                                                                                     |            |
|---------------------------------------------------------------------------------------------------------------------------------------------------------------------|------------|
| <b>Supplementary Fig. 1 Long-term test of photocatalytic CO<sub>2</sub> reduction over photocatalysts.</b>                                                          | <b>S5</b>  |
| <b>Supplementary Fig. 2 Photocatalytic CO<sub>2</sub> reduction in different gas environment.</b>                                                                   | <b>S5</b>  |
| <b>Supplementary Fig. 3 GC-MS of gas products after the photocatalytic reaction over Pd-HPP-TiO<sub>2</sub>.</b>                                                    | <b>S6</b>  |
| <b>Supplementary Fig. 4 Electrochemical impedance spectra (EIS) of as-prepared photocatalysts.</b>                                                                  | <b>S7</b>  |
| <b>Supplementary Fig. 5. Photoluminescence (PL) spectra of as-prepared photocatalysts.</b>                                                                          | <b>S8</b>  |
| <b>Supplementary Fig. 6 UV-vis diffuse reflectance spectra of as-prepared photocatalysts.</b>                                                                       | <b>S9</b>  |
| <b>Supplementary Fig. 7 The evolution rates of CH<sub>4</sub> and CO in pure CO<sub>2</sub> under visible light irradiation (<math>\lambda \geq 420</math> nm).</b> | <b>S9</b>  |
| <b>Supplementary Fig. 8 Effect of O<sub>2</sub> existence on the photocatalytic CO<sub>2</sub> reduction.</b>                                                       | <b>S10</b> |
| <b>Supplementary Fig. 9 Effect of CO<sub>2</sub> concentration on the photocatalytic CO<sub>2</sub> reduction.</b>                                                  | <b>S10</b> |
| <b>Supplementary Fig. 10 CO<sub>2</sub> adsorption and desorption isotherms at 273 K.</b>                                                                           | <b>S11</b> |
| <b>Supplementary Fig. 11 CO<sub>2</sub> adsorption and desorption isotherms of porous Pd-HPP-TiO<sub>2</sub> composites at 273 K.</b>                               | <b>S11</b> |
| <b>Supplementary Fig. 12 The evolution rates of CH<sub>4</sub> and CO over porous Pd-HPP-TiO<sub>2</sub> composites.</b>                                            | <b>S12</b> |

|                                                                                                                                                                                                      |     |
|------------------------------------------------------------------------------------------------------------------------------------------------------------------------------------------------------|-----|
| <b>Supplementary Fig. 13 Comparisons in CO<sub>2</sub> and O<sub>2</sub> adsorption isotherms at 273 K.</b>                                                                                          | S12 |
| <b>Supplementary Fig. 14 SEM images.</b>                                                                                                                                                             | S13 |
| <b>Supplementary Fig. 15 Low-magnified TEM image of Pd-HPP-TiO<sub>2</sub>.</b>                                                                                                                      | S13 |
| <b>Supplementary Fig. 16 FT-IR spectra of of as-prepared photocatalysts.</b>                                                                                                                         | S14 |
| <b>Supplementary Fig. 17 XPS spectra of hollow TiO<sub>2</sub>, Pd/TiO<sub>2</sub>, Pd-HPP, and Pd-HPP-TiO<sub>2</sub>.</b>                                                                          | S15 |
| <b>Supplementary Fig. 18 In situ DRIFTS tests in the region of 3500-3800 cm<sup>-1</sup>.</b>                                                                                                        | S16 |
| <b>Supplementary Fig. 19 Cycling test of photocatalytic CO<sub>2</sub> reduction.</b>                                                                                                                | S16 |
| <b>Supplementary Fig.e 20 Thermogravimetric analysis of Pd-HPP at a heating rate of 10 °C min<sup>-1</sup> in air.</b>                                                                               | S17 |
| <b>Supplementary Fig. 21 Changes in the FT-IR spectra of Pd-HPP-TiO<sub>2</sub> by the photocatalysis.</b>                                                                                           | S17 |
| <b>Supplementary Fig. 22 XRD patterns of Pd-HPP-TiO<sub>2</sub> before and after the photocatalytic reaction.</b>                                                                                    | S18 |
| <b>Supplementary Fig. 23 XPS spectra of Pd-HPP-TiO<sub>2</sub> before and after the photocatalytic reaction.</b>                                                                                     | S19 |
| <b>Supplementary Fig. 24 Full spectrum of light source.</b>                                                                                                                                          | S20 |
| <b>Supplementary Table 1 Comparison of the photocatalytic activity of Pd-HPP-TiO<sub>2</sub> with the recently reported catalysts for CO<sub>2</sub> reduction under similar reaction conditions</b> | S20 |
| <b>Supplementary Table 2 Comparisons of photocatalytic CO<sub>2</sub> conversion in air reported recently.</b>                                                                                       | S21 |

|                                                                                                                                                                      |     |
|----------------------------------------------------------------------------------------------------------------------------------------------------------------------|-----|
| <b>Supplementary Table 3 Conversion yield of CO<sub>2</sub> in 0.15 vol% CO<sub>2</sub>/N<sub>2</sub> and air for Pd-HPP-TiO<sub>2</sub> and Pd/TiO<sub>2</sub>.</b> | S21 |
| <b>Supplementary Table 4 The porosity parameters and gas uptake of as-prepared photocatalysts.</b>                                                                   | S22 |
| <b>Supplementary Table 5 Comparison of the molar ratio of porphyrin/CO<sub>2</sub> in different photocatalysts.</b>                                                  | S22 |
| <b>Supplementary Table 6 EXAFS fitting parameters at the Pd K-edge (<math>S_0^2=0.829</math>).</b>                                                                   | S23 |
| <b>Supplementary Table 7 Pd and TiO<sub>2</sub> contents in Pd-HPP-TiO<sub>2</sub> and Pd/TiO<sub>2</sub> based on the ICP-MS measurements.</b>                      | S23 |
| <b>Supplementary References</b>                                                                                                                                      | S23 |

## Supplementary Figures

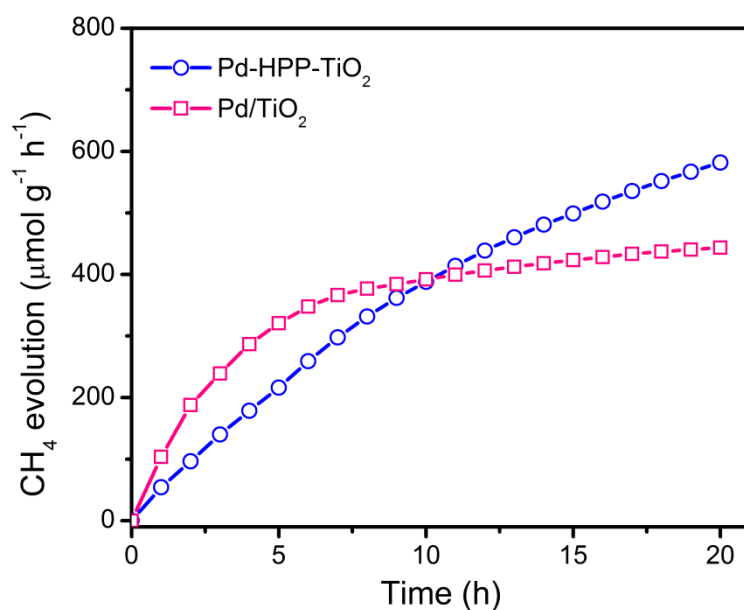

**Supplementary Fig. 1** Long-term test of photocatalytic CO<sub>2</sub> reduction over photocatalysts.

(a) Pd-HPP-TiO<sub>2</sub> and (b) Pd/TiO<sub>2</sub>.

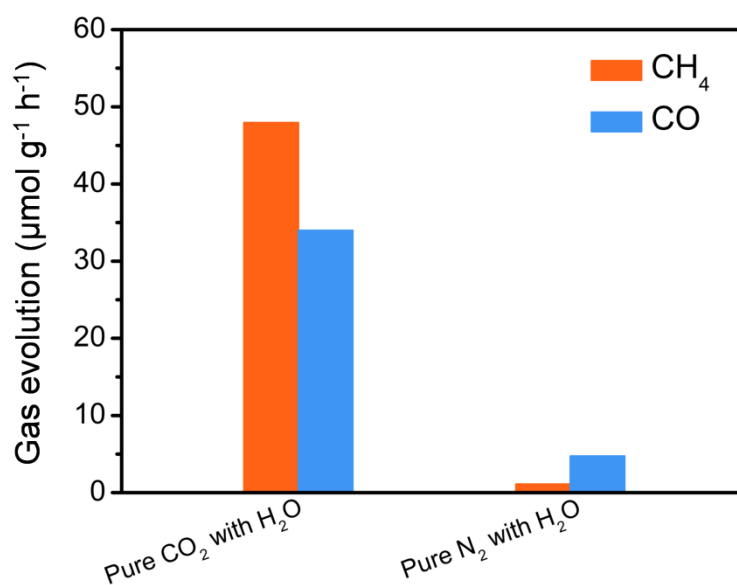

**Supplementary Fig. 2** Photocatalytic CO<sub>2</sub> reduction in different gas environment. The evolution rates of CH<sub>4</sub> and CO over Pd-HPP-TiO<sub>2</sub> in pure CO<sub>2</sub> or N<sub>2</sub> with H<sub>2</sub>O.

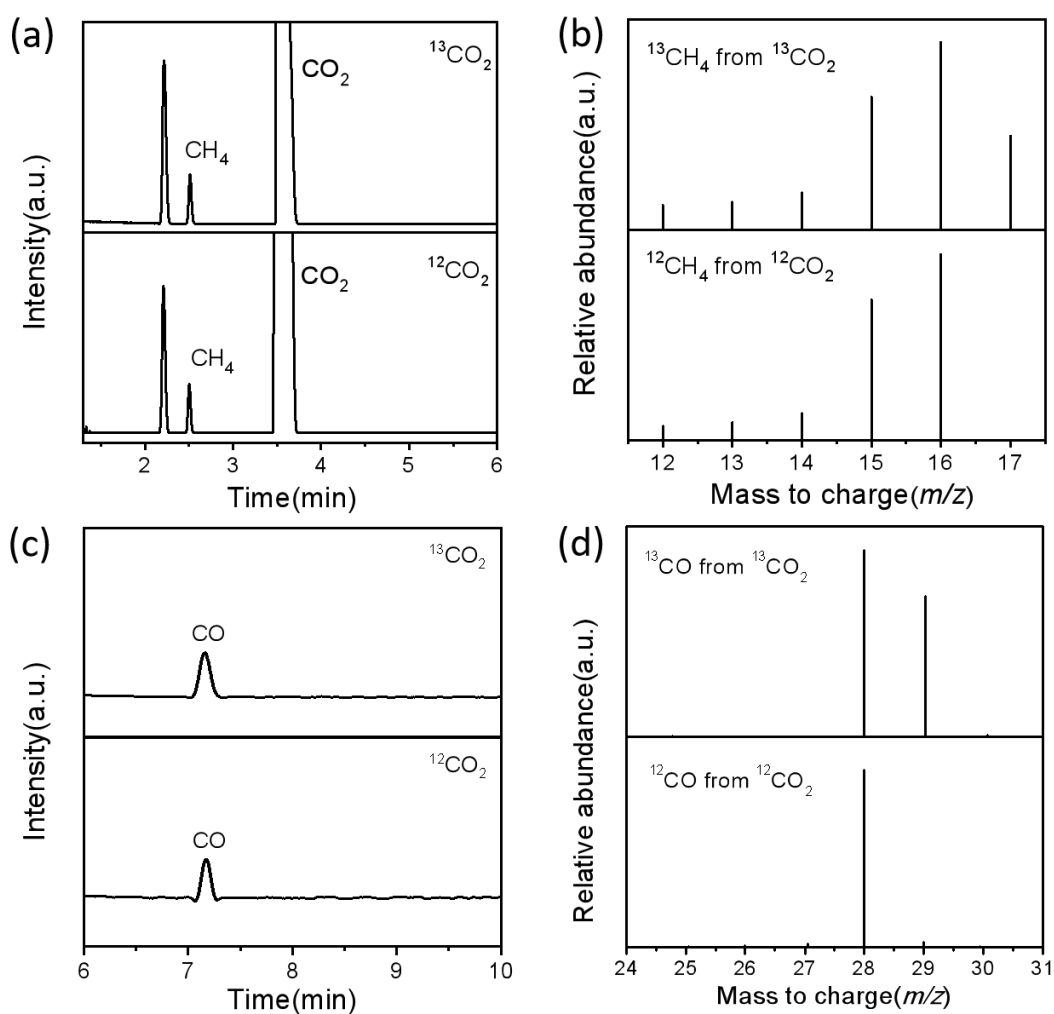

**Supplementary Fig. 3 GC-MS of gas products after the photocatalytic reaction over Pd-HPP-TiO<sub>2</sub>.** (a, c) GC charts and (b, d) MS of CH<sub>4</sub> and CO produced from the isotopically labelled  $^{13}\text{CO}_2$  ( $^{13}\text{C}$  enrichment of  $\geq 97\%$ ) and  $^{12}\text{CO}_2$  used as the reactant.

The appearance of  $m/z = 17$  reveals that the produced  $^{13}\text{CH}_4$  indeed originated from the  $^{13}\text{CO}_2$  reduction over Pd-HPP-TiO<sub>2</sub>. The peaks at  $m/z = 16$  and  $15$  are assigned to the fragments of  $^{13}\text{CH}_4$ . The peaks at  $m/z = 29$  reveals that the produced  $^{13}\text{CO}$  originated from  $^{13}\text{CO}_2$  reduction over Pd-HPP-TiO<sub>2</sub>. The residual and pre-adsorbed  $^{12}\text{CO}_2$  on Pd-HPP-TiO<sub>2</sub> and glass surface of the reactor from air are not negligible in contributing to  $m/z = 28$ ,  $16$  and  $15$ .

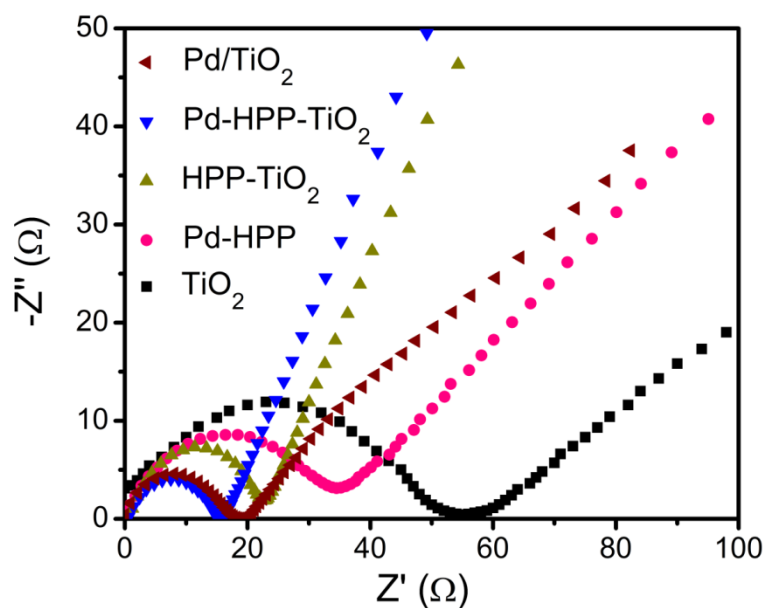

**Supplementary Fig. 4 Electrochemical impedance spectra (EIS) of the as-prepared samples.**

Work electrode: indium-tin-oxide (ITO) glass dip-coated by the samples; reference electrode: Ag/AgCl electrode; counter electrode: platinum wire; electrolyte: 0.1 M KCl aqueous solution containing 5 mM  $\text{Fe}(\text{CN})_6^{3-}/\text{Fe}(\text{CN})_6^{4-}$ .

The size of the semicircle at high frequencies in the EIS Nyquist diagram represents the charge transfer resistance ( $R_{ct}$ ). Pd-HPP and  $\text{TiO}_2$  show large  $R_{ct}$  due to lower electronic conductivities than that of Pd-HPP- $\text{TiO}_2$ , suggesting the efficient electron transfer between  $\text{TiO}_2$  and Pd-HPP with effective interfacial interaction and efficient charge transfer in Pd-HPP.

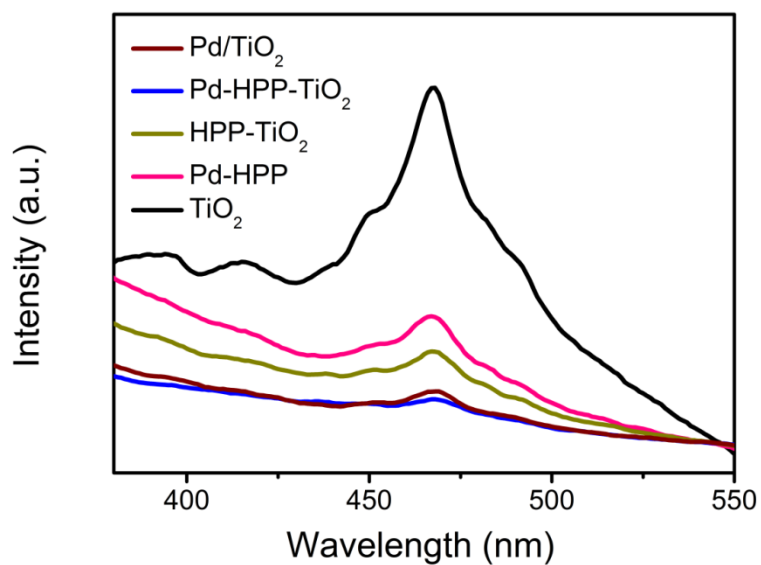

**Supplementary Fig. 5 Photoluminescence (PL) spectra of as-prepared photocatalysts.** Those of Pd/TiO<sub>2</sub>, Pd-HPP-TiO<sub>2</sub>, HPP-TiO<sub>2</sub>, Pd-HPP, and TiO<sub>2</sub> at 360 nm excitation were compared.

Hollow TiO<sub>2</sub> exhibited a strong and broad emission band in the region of 380-550 nm, assigned to the surface defects<sup>1</sup>. The largest PL quenching was observed for Pd-HPP-TiO<sub>2</sub>, indicating a decrease of charge recombination because of rapid electron transfer from TiO<sub>2</sub> to Pd-HPP.



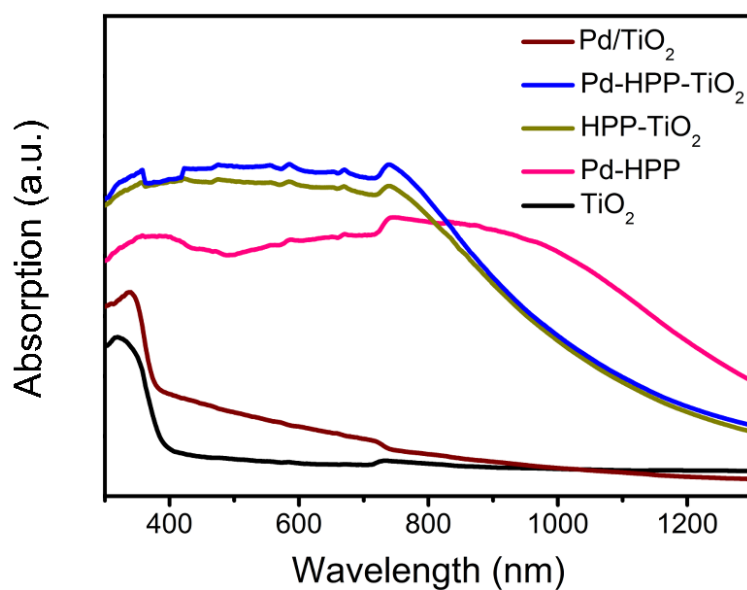

**Supplementary Fig. 6 UV-vis diffuse reflectance spectra of as-prepared photocatalysts.**

Those of Pd/TiO<sub>2</sub>, Pd-HPP-TiO<sub>2</sub>, HPP-TiO<sub>2</sub>, Pd-HPP, and TiO<sub>2</sub> were compared.

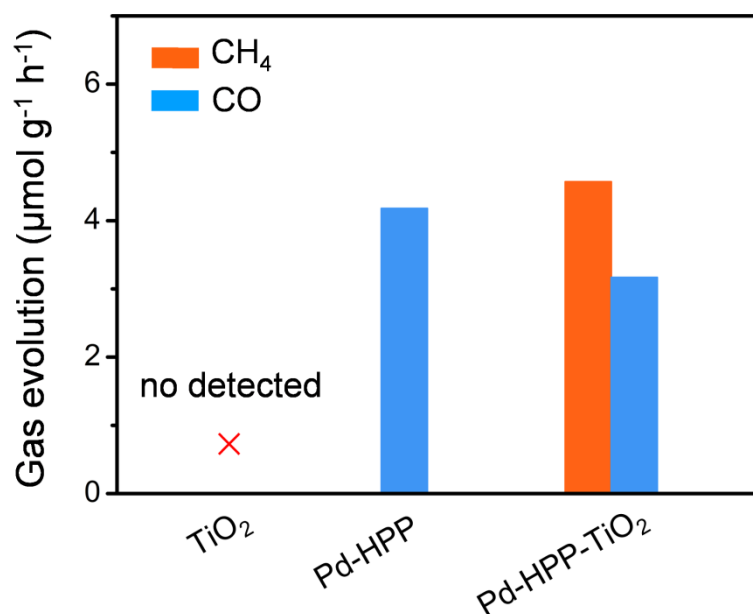

**Supplementary Fig. 7 The evolution rates of CH<sub>4</sub> and CO in pure CO<sub>2</sub> under visible light irradiation ( $\lambda \geq 420$  nm). The rates over TiO<sub>2</sub>, Pd-HPP, and Pd-HPP-TiO<sub>2</sub> were compared.**

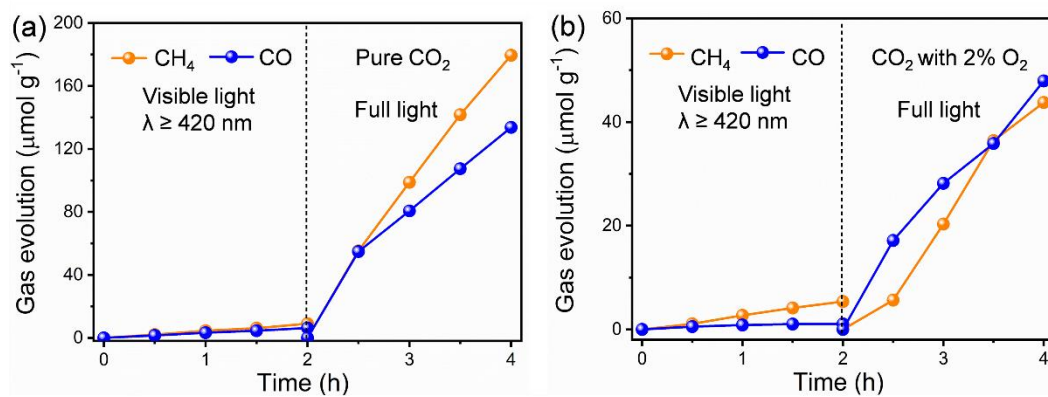

**Supplementary Fig. 8 Effect of O<sub>2</sub> existence on the photocatalytic CO<sub>2</sub> reduction.** The evolution rates of CH<sub>4</sub> and CO over Pd-HPP-TiO<sub>2</sub> photocatalyst under visible light irradiation ( $\lambda \geq 420$  nm) and full light irradiation. (a) in pure CO<sub>2</sub> (b) in CO<sub>2</sub> with 2 vol% O<sub>2</sub>.

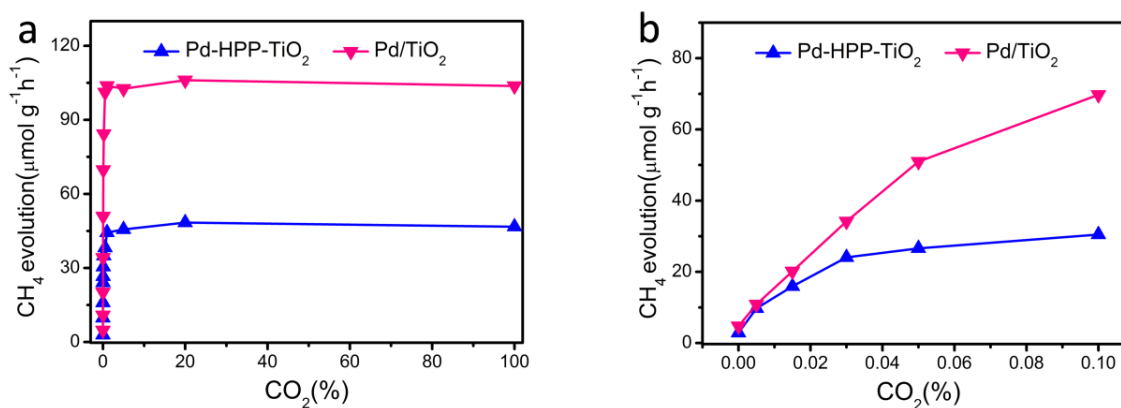

**Supplementary Fig. 9 Effect of CO<sub>2</sub> concentration on the photocatalytic CO<sub>2</sub> reduction.** The CH<sub>4</sub> evolution rate in CO<sub>2</sub>/N<sub>2</sub> synthetic gas over Pd/TiO<sub>2</sub> and Pd-HPP-TiO<sub>2</sub> photocatalysts.

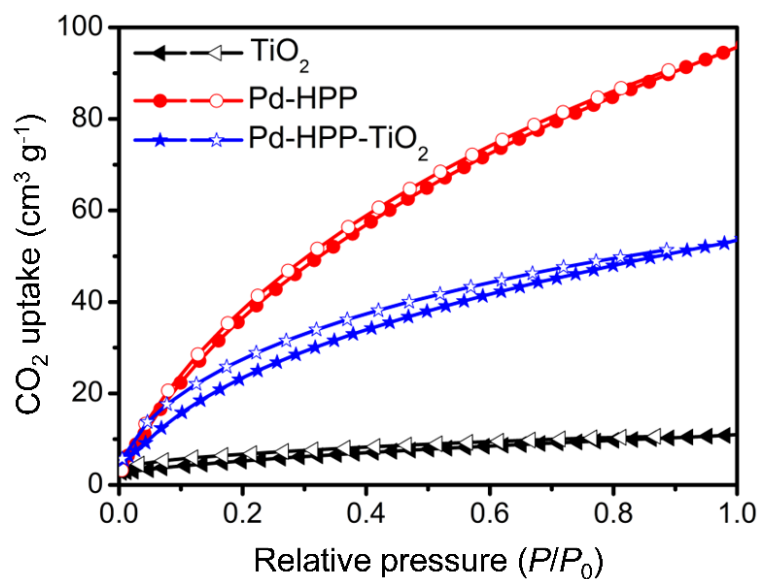

**Supplementary Fig. 10** CO<sub>2</sub> adsorption and desorption isotherms at 273 K. Those of hollow TiO<sub>2</sub>, Pd-HPP, and Pd-HPP-TiO<sub>2</sub> were compared.

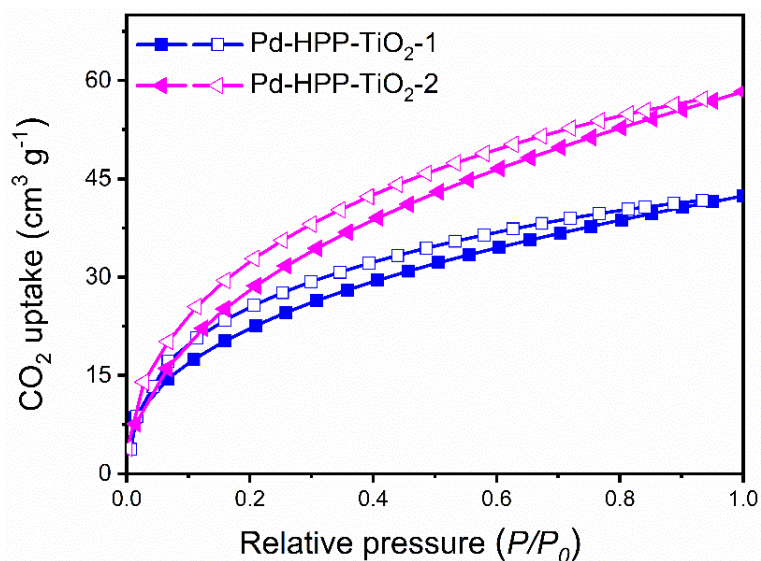

**Supplementary Fig. 11** CO<sub>2</sub> adsorption and desorption isotherms of porous Pd-HPP-TiO<sub>2</sub> composites at 273 K. Pd-HPP-TiO<sub>2</sub>-1 was synthesized by adding 15 mg of TPP monomer. Pd-HPP-TiO<sub>2</sub>-2 was synthesized by adding 45 mg of TPP monomer.

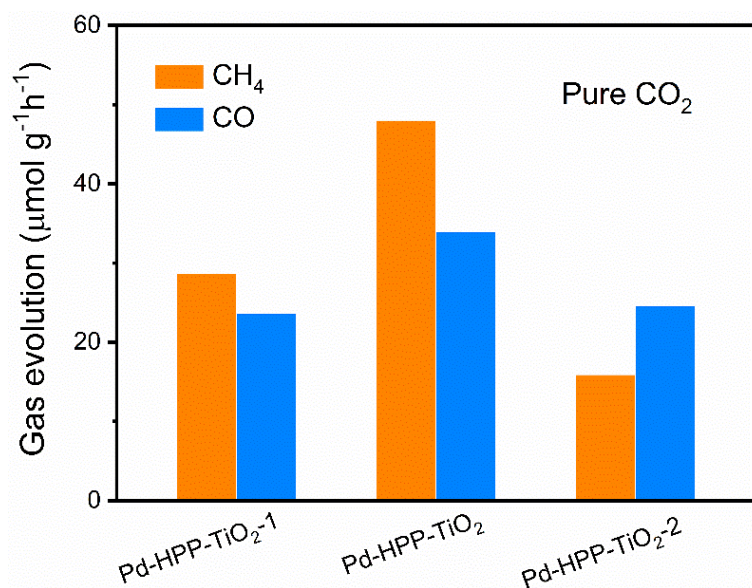

**Supplementary Fig. 12** The evolution rates of CH<sub>4</sub> and CO over porous Pd-HPP-TiO<sub>2</sub> composites. Pd-HPP-TiO<sub>2</sub>-1 was synthesized by adding 15 mg of TPP monomer. Pd-HPP-TiO<sub>2</sub> was synthesized by adding 30 mg of TPP monomer. Pd-HPP-TiO<sub>2</sub>-2 was synthesized by adding 45 mg of TPP monomer.

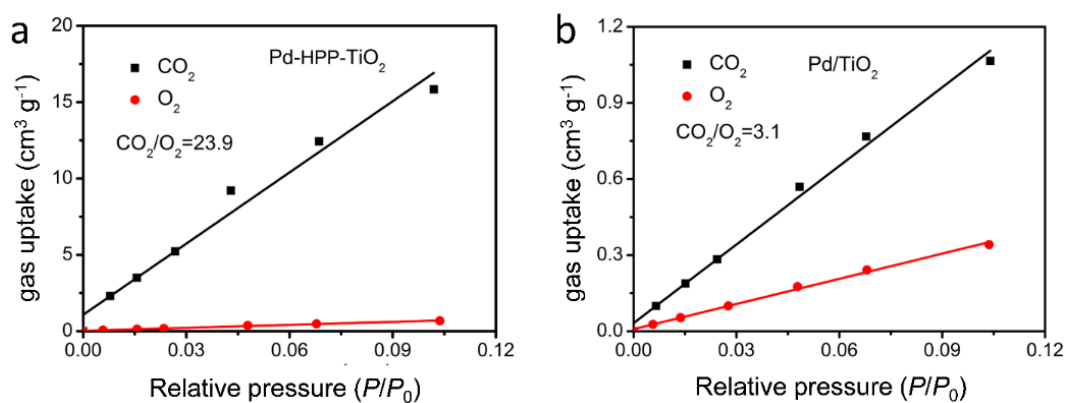

**Supplementary Fig. 13** Comparisons in CO<sub>2</sub> and O<sub>2</sub> adsorption isotherms at 273 K. (a) Pd-HPP-TiO<sub>2</sub> and (b) Pd/TiO<sub>2</sub>. The CO<sub>2</sub>/O<sub>2</sub> selectivity ratio was calculated by the initial slopes of adsorption isotherms in the pressure less than 0.1<sup>2,3</sup>.

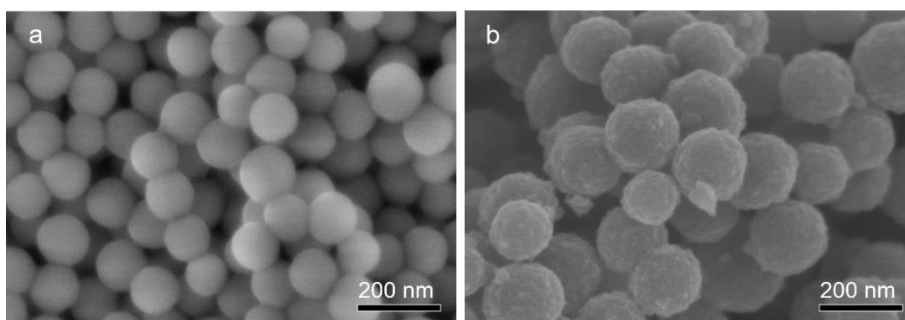

**Supplementary Fig. 14 SEM images. (a)  $\text{SiO}_2$  spheres and (b) core-shell  $\text{SiO}_2@ \text{TiO}_2$ .**

The SEM image indicates that  $\text{SiO}_2$  spheres were covered by  $\text{TiO}_2$  to form core-shell  $\text{SiO}_2@ \text{TiO}_2$ .

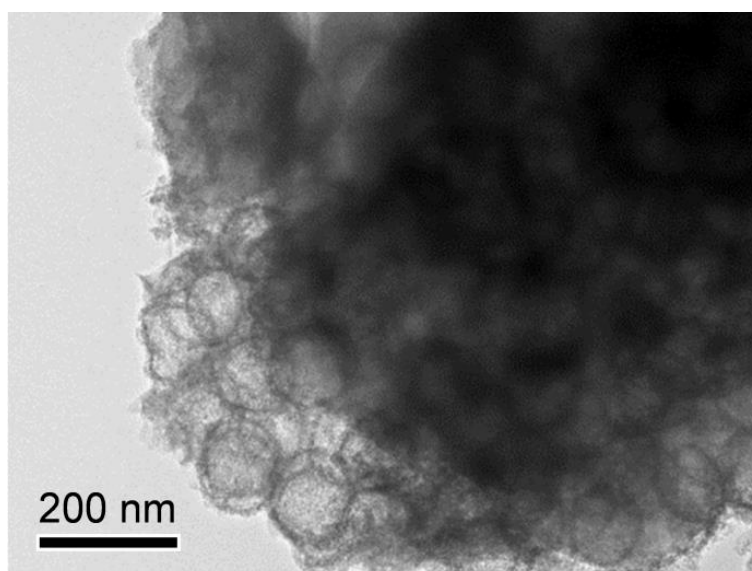

**Supplementary Fig. 15 Low-magnified TEM image of Pd-HPP- $\text{TiO}_2$ .**

After step I and II in Figure 1, hollow  $\text{TiO}_2$  were uniformly covered by Pd-HPP as shown in transmission electron microscopy (TEM) images (Figures 4b and S15).

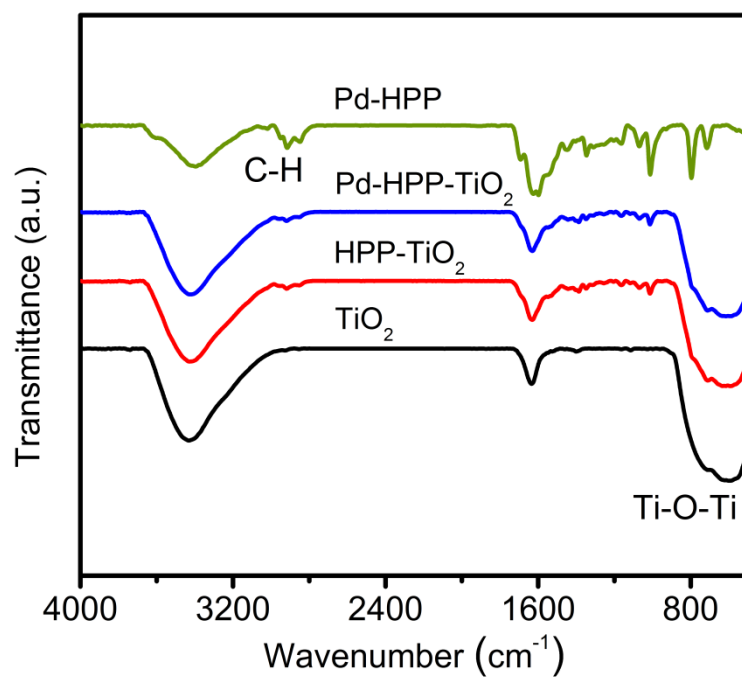

**Supplementary Fig. 16 FT-IR spectra of of as-prepared photocatalysts.** Those of hollow TiO<sub>2</sub>, HPP-TiO<sub>2</sub>, Pd-HPP, and Pd-HPP-TiO<sub>2</sub> were compared.

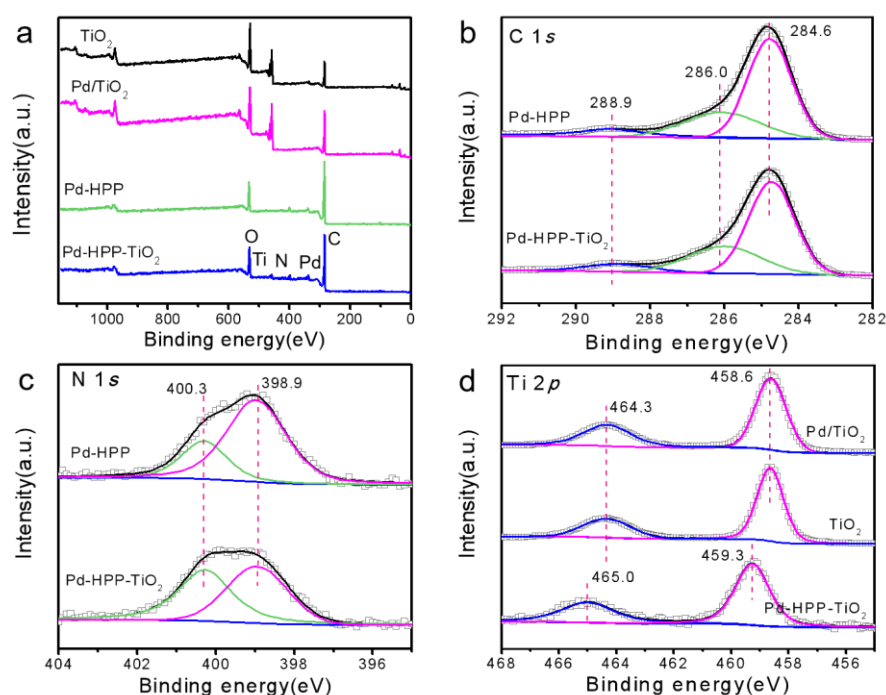

**Supplementary Fig. 17 XPS spectra of hollow  $\text{TiO}_2$ ,  $\text{Pd/TiO}_2$ ,  $\text{Pd-HPP}$ , and  $\text{Pd-HPP-TiO}_2$ .**

(a) XPS survey spectra. High-resolution XPS spectra of (b) C 1s, (c) N 1s, and (d) Ti 2p in the corresponding samples.

The high-resolution C 1s spectra were deconvoluted to three peaks at 288.9, 286.0, and 284.6 eV, assigned to Cs of C-N, C=N, and C-C of HPP, respectively. The N 1s spectra show two peaks at 400.3 and 398.9 eV, corresponding to pyrrolic-N and Pd-N in Pd-HPP. Combined with the presence of Pd(II) in Pd 3d spectra (Figure 5b), it can be deduced that Pd(II) coordinates with the porphyrin. The intensity of the Pd-N peak decreased in Pd-HPP-TiO<sub>2</sub>, presumably due to the interaction between TiO<sub>2</sub> and N of the porphyrin. In the high-resolution Ti 2p spectra, two peaks were observed at 464.3 and 458.6 eV, corresponding to Ti 2p<sub>3/2</sub> and Ti 2p<sub>1/2</sub>. The interaction between Pd-HPP and TiO<sub>2</sub> causes higher-energy shifts of ~0.7 eV for two peaks.

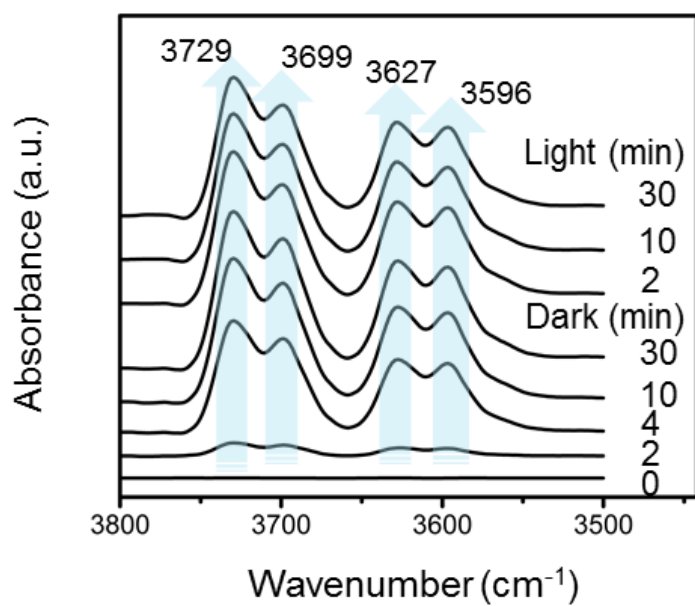

**Supplementary Fig. 18** In situ DRIFTS tests in the region of 3500-3800  $\text{cm}^{-1}$ . Gas adsorption and photocatalytic reaction over Pd-HPP-TiO<sub>2</sub> in the dark and under UV-visible light irradiation.

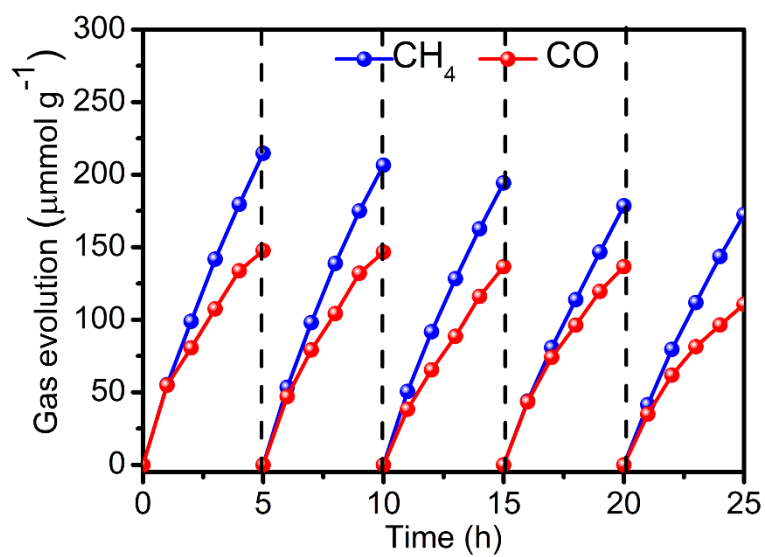

**Supplementary Fig. 19** Cycling test of photocatalytic CO<sub>2</sub> reduction. The CH<sub>4</sub> and CO evolution over Pd-HPP-TiO<sub>2</sub> within 5 cycles.



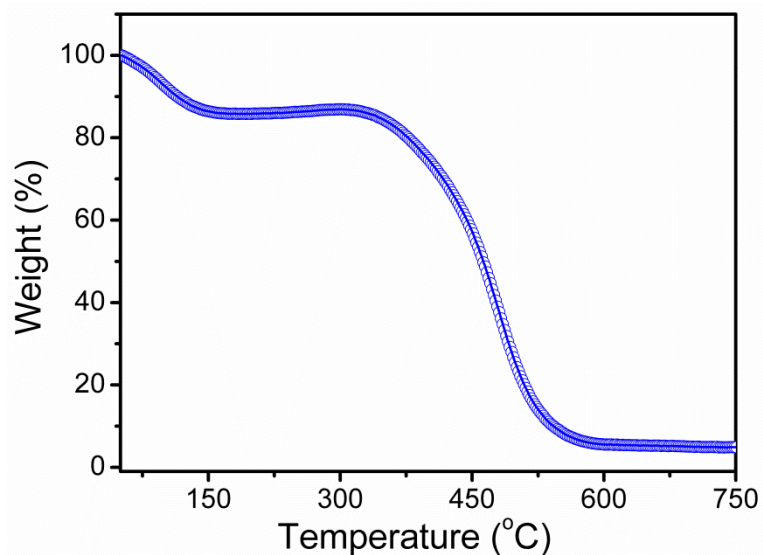

**Supplementary Fig. 20 Thermogravimetric analysis of Pd-HPP at a heating rate of 10 °C min<sup>-1</sup> in air.**

The thermostability of Pd-HPP was investigated by thermogravimetric analysis. Upon heating, the weight loss of about 5.1 % below 150 °C came from the adsorbed water and other gaseous molecules. The decomposition of HPP was observed when Pd-HPP was heated at higher than 330 °C.

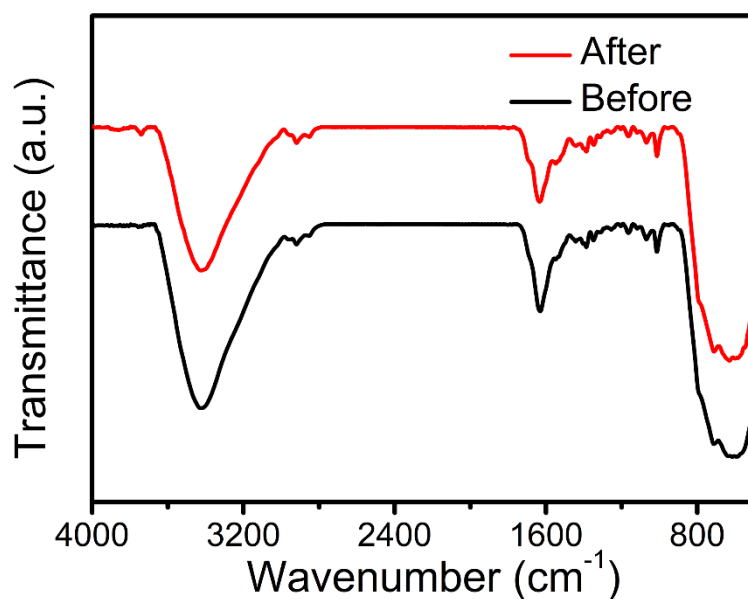

**Supplementary Fig. 21 Changes in the FT-IR spectra of Pd-HPP-TiO<sub>2</sub> by the photocatalysis.**

Comparison between before and after the photocatalytic reaction.

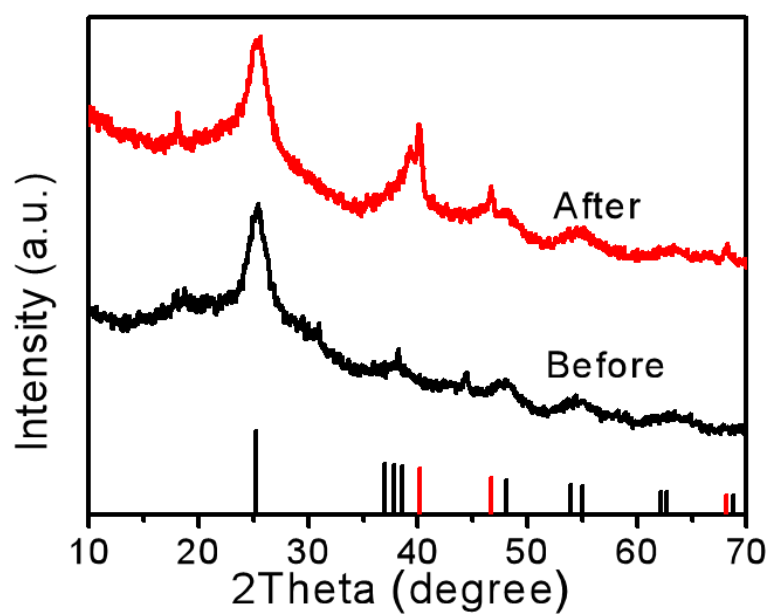

**Supplementary Fig. 22 XRD patterns of Pd-HPP-TiO<sub>2</sub> before and after the photocatalytic reaction.**

The vertical lines are the position and intensity of anatase TiO<sub>2</sub> (black line, JCPDS 21-1272) and Pd (red line, JCPDS 46-1043).

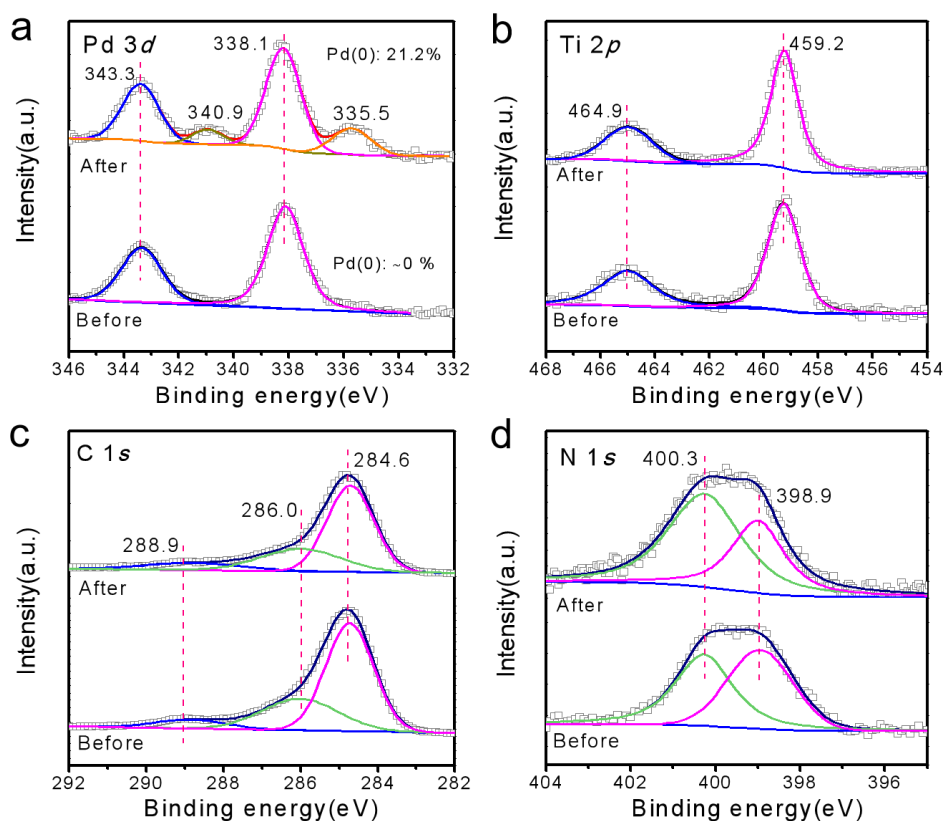

**Supplementary Fig. 23 XPS spectra of Pd-HPP-TiO<sub>2</sub> before and after the photocatalytic reaction.** (a) Pd 3d, (b) Ti 2p, (c) C 1s, and (d) N 1s. The ratio of Pd (II) and Pd (0) was calculated for Pd-HPP-TiO<sub>2</sub> before and after the reaction.

After the photocatalytic reaction, Pd existed as Pd(II) in ~78.8%, i.e. 21.2% of Pd(II) of Pd-HPP-TiO<sub>2</sub> changed to Pd(0). The largely remained Pd(II) in the composite can be ascribed to the confinement effect and coordination with porphyrin of HPP. No significant difference was observed in the spectra of Ti 2p, C 1s, and N 1s, indicating the durability of HPP and TiO<sub>2</sub>.

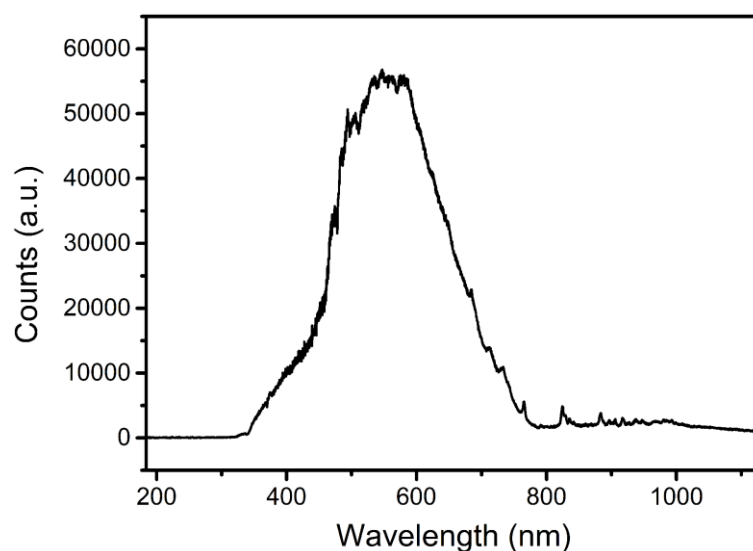

**Supplementary Fig. 24** Full spectrum of light source. Light: Xe lamp (PLS-SXE300D, Beijing Perfectlight, China).

**Supplementary Table 1** Comparison of the photocatalytic activity of Pd-HPP-TiO<sub>2</sub> with the recently reported catalysts for CO<sub>2</sub> reduction under similar reaction conditions (gas-solid reaction just using H<sub>2</sub>O as electron donor).

| Photocatalysts                                                          | Products ( $\mu\text{mol g}^{-1} \text{h}^{-1}$ ) |       | Ref       |
|-------------------------------------------------------------------------|---------------------------------------------------|-------|-----------|
|                                                                         | CH <sub>4</sub>                                   | CO    |           |
| Pyrazolyl Porphyrinic Ni-MOF                                            | 10.1                                              | 6.0   | 5         |
| 1%B/g-C <sub>3</sub> N <sub>4</sub>                                     | 0.16                                              | -     | 6         |
| $\alpha$ -Fe <sub>2</sub> O <sub>3</sub> /Amine-RGO/CsPbBr <sub>3</sub> | 28.5                                              | 6.0   | 7         |
| V <sub>o</sub> -BiOIO <sub>3</sub>                                      | -                                                 | 16.33 | 8         |
| N-Doped Graphene on CdS                                                 | 0.33                                              | 2.59  | 9         |
| V <sub>s</sub> -CuIn <sub>5</sub> S <sub>8</sub>                        | 8.7                                               | -     | 10        |
| Porous CoO@N-GCs                                                        | 10.03                                             | 5.16  | 11        |
| Hypercrosslinked Polymers-3                                             | 0.30                                              | 5.10  | 12        |
| Porphyrin Based COF                                                     | -                                                 | 24.6  | 13        |
| Triphenylamine Based CMPs                                               | -                                                 | 37.15 | 14        |
| ZnSe/CdS DORs                                                           | -                                                 | 11.3  | 15        |
| Pd-HPP-TiO <sub>2</sub>                                                 | 48                                                | 34    | This work |

**Supplementary Table 2** Comparisons of photocatalytic CO<sub>2</sub> conversion in air reported recently.

| Photocatalysts                                                           | $S_{\text{BET}}$<br>(m <sup>2</sup> g <sup>-1</sup> ) | Irradiation<br>light, additives      | Products<br>( $\mu\text{mol g}^{-1} \text{h}^{-1}$ )                            | Conversion<br>yield of CO <sub>2</sub> | References |
|--------------------------------------------------------------------------|-------------------------------------------------------|--------------------------------------|---------------------------------------------------------------------------------|----------------------------------------|------------|
| Rb <sub>0.33</sub> WO <sub>3</sub>                                       | 5.0                                                   | UV-vis, H <sub>2</sub> O             | CH <sub>3</sub> OH: 3.73;<br>CO: 0.07;<br>CH <sub>4</sub> : 0.02;<br>HCHO: 1.05 | 4.3 % (4 h)                            | 16         |
| Mo-doped<br>Cs <sub>0.33</sub> WO <sub>3</sub>                           | --                                                    | UV-vis, H <sub>2</sub> O,            | CO: 3.4;<br>CH <sub>3</sub> OH: 1                                               | --                                     | 17         |
| Ionic<br>liquid([P <sub>4444</sub> ][p-2-<br>O])-pyrene-based<br>polymer | 23.9                                                  | $\lambda > 420 \text{ nm}$ ,<br>TEOA | CO: 47.37                                                                       | --                                     | 18         |
| Pd/TiO <sub>2</sub> (control)                                            | 61                                                    | UV-vis, H <sub>2</sub> O             | CH <sub>4</sub> : 2.7;<br>CO: --                                                | 2.6 % (2 h)                            | This work  |
| Pd-HPP-TiO <sub>2</sub>                                                  | 323.0                                                 | UV-vis, H <sub>2</sub> O             | CH <sub>4</sub> : 12.2;<br>CO: 4.9                                              | 12 % (2 h)                             | This work  |

**Supplementary Table 3** Conversion yield of CO<sub>2</sub> in 0.15 vol% CO<sub>2</sub>/N<sub>2</sub> and air for Pd-HPP-TiO<sub>2</sub> and Pd/TiO<sub>2</sub>.

| Photocatalysts          | Atmosphere                                | CO <sub>2</sub> in the reactor (ppm) (CO <sub>2</sub> conversion rate (%)) |                     |                     |
|-------------------------|-------------------------------------------|----------------------------------------------------------------------------|---------------------|---------------------|
|                         |                                           | Before<br>reaction                                                         | Irradiation for 1 h | Irradiation for 2 h |
| Pd/TiO <sub>2</sub>     | 0.15 vol% CO <sub>2</sub> /N <sub>2</sub> | 1384<br>(-)                                                                | 1297<br>(6.3)       | 1224<br>(12)        |
|                         | Air                                       | 332<br>(-)                                                                 | 326<br>(1.9)        | 323<br>(2.7)        |
| Pd-HPP-TiO <sub>2</sub> | 0.15 vol% CO <sub>2</sub> /N <sub>2</sub> | 1362<br>(-)                                                                | 1322<br>(3.0)       | 1285<br>(5.7)       |
|                         | Air                                       | 319<br>(-)                                                                 | 297<br>(7.2)        | 282<br>(12)         |

**Supplementary Table 4** The porosity parameters and gas uptake of as-prepared photocatalysts.

| Photocatalysts         | $S_{\text{BET}}^{\text{[a]}}$<br>( $\text{m}^2 \text{g}^{-1}$ ) | Pore<br>volume <sup>[b]</sup><br>( $\text{cm}^3 \text{g}^{-1}$ ) | Micropore<br>volume <sup>[c]</sup><br>( $\text{cm}^3 \text{g}^{-1}$ ) | $\text{CO}_2$<br>uptake <sup>[d]</sup><br>( $\text{cm}^3 \text{g}^{-1}$ ) | $\text{O}_2$ uptake <sup>[e]</sup><br>( $\text{cm}^3 \text{g}^{-1}$ ) |
|------------------------|-----------------------------------------------------------------|------------------------------------------------------------------|-----------------------------------------------------------------------|---------------------------------------------------------------------------|-----------------------------------------------------------------------|
| Pd-HPP                 | 1252                                                            | 0.71                                                             | 0.61                                                                  | 96                                                                        | -                                                                     |
| $\text{TiO}_2$         | 75                                                              | 0.13                                                             | -                                                                     | 11                                                                        | -                                                                     |
| Pd-HPP- $\text{TiO}_2$ | 323                                                             | 0.29                                                             | 0.22                                                                  | 54                                                                        | 4.3                                                                   |
| Pd/ $\text{TiO}_2$     | 61                                                              | 0.1                                                              | -                                                                     | 6.5                                                                       | 2.8                                                                   |

[a] Calculated from the  $\text{N}_2$  adsorption-desorption isotherms at 77.3 K. [b] Calculated from  $\text{N}_2$  isotherm at  $P/P_0=0.995$  and 77.3 K. [c] Calculated from the  $\text{N}_2$  isotherm at  $P/P_0=0.050$ . [d] Calculated from the  $\text{CO}_2$  adsorption-desorption isotherms at 1.00 bar and 273 K. [e] Calculated from the  $\text{O}_2$  adsorption-desorption isotherms at 1.00 bar and 273 K.

**Supplementary Table 5** Comparison of the molar ratio of porphyrin/ $\text{CO}_2$  in different photocatalysts.

| Photocatalysts                           | Pd-HPP Content<br>(wt%) | Porphyrin Content<br>(wt%) | $\text{CO}_2$ uptake<br>( $\text{cm}^3 \text{g}^{-1}$ ) <sup>[d]</sup> | Porphyrin/ $\text{CO}_2$<br>(molar ratio) |
|------------------------------------------|-------------------------|----------------------------|------------------------------------------------------------------------|-------------------------------------------|
| Pd-HPP                                   | 100                     | 70.5                       | 96                                                                     | 1:3.7                                     |
| Pd-HPP- $\text{TiO}_2$ -1 <sup>[a]</sup> | 53.8                    | 37.9                       | 42.4                                                                   | 1:3.1                                     |
| Pd-HPP- $\text{TiO}_2$ <sup>[b]</sup>    | 65.6                    | 46.2                       | 54                                                                     | 1:3.2                                     |
| Pd-HPP- $\text{TiO}_2$ -2 <sup>[c]</sup> | 74.9                    | 52.8                       | 58.3                                                                   | 1:3.0                                     |

[a] Pd-HPP- $\text{TiO}_2$ -1 was synthesized by adding 15 mg of TPP monomer.

[b] Pd-HPP- $\text{TiO}_2$  was synthesized by adding 30 mg of TPP monomer.

[c] Pd-HPP- $\text{TiO}_2$ -2 was synthesized by adding 45 mg of TPP monomer.

[d] Calculated from the  $\text{CO}_2$  adsorption-desorption isotherms at 1.00 bar and 273 K.

**Supplementary Table 6** EXAFS fitting parameters at the Pd K-edge ( $S_0^2 = 0.829$ )<sup>[a]</sup>.

| Photocatalyst           | Shell | <i>N</i> | <i>R</i> (Å) | $\sigma^2$ (Å <sup>2</sup> ) | $\Delta E_0$ (eV) | <i>R</i> factor <sup>[b]</sup> |
|-------------------------|-------|----------|--------------|------------------------------|-------------------|--------------------------------|
| Pd-HPP-TiO <sub>2</sub> | Pd-N  | 3.9      | 2.03         | 0.0043                       | 2.6               | 0.0001                         |

<sup>[a]</sup> $S_0^2$  was set to 0.829, according to the experimental EXAFS fit of Pd foil reference by fixing CN as the known crystallographic value.

<sup>[b]</sup>*N*: coordination numbers; *R*: bond distance;  $\sigma^2$ : Debye-Waller factor;  $\Delta E_0$ : the inner potential correction. *R* factor: goodness of fit.

**Supplementary Table 7** Pd and TiO<sub>2</sub> contents in Pd-HPP-TiO<sub>2</sub> and Pd/TiO<sub>2</sub> based on the ICP-MS measurements.

| Photocatalysts          | Pd content (wt%) | TiO <sub>2</sub> content (wt%) |
|-------------------------|------------------|--------------------------------|
| Pd-HPP-TiO <sub>2</sub> | 2.72             | 34.4                           |
| Pd/TiO <sub>2</sub>     | 2.68             | 97.3                           |

### Supplementary References

1. Ma, Y. *et al.* Assembling ultrafine TiO<sub>2</sub> nanoparticles on UiO-66 octahedrons to promote selective photocatalytic conversion of CO<sub>2</sub> to CH<sub>4</sub> at a low concentration. *Appl. Catal. B-Environ.* **270**, 118856 (2020).
2. Wang, S. *et al.* Porous hypercrosslinked polymer-TiO<sub>2</sub>-graphene composite photocatalysts for visible-light-driven CO<sub>2</sub> conversion. *Nat. Commun.* **10**, 626 (2019).
3. Saleh, M., Lee, H. M., Kemp, K. C., Kim, K. S. Highly stable CO<sub>2</sub>/N<sub>2</sub> and CO<sub>2</sub>/CH<sub>4</sub> selectivity in hyper-cross-linked heterocyclic porous polymers. *ACS Appl. Mater. Interfaces* **6**, 7325–7333 (2014).
4. Lu, C. *et al.* Atomic Ni anchored covalent triazine framework as high efficient electrocatalyst for carbon dioxide conversion. *Adv. Funct. Mater.* **29**, 1806884 (2019).
5. Fang, Z. *et al.* Boosting interfacial charge-transfer kinetics for efficient overall CO<sub>2</sub> photoreduction via rational design of coordination spheres on metal-organic frameworks *J. Am. Chem. Soc.* **142**, 12515-12523 (2020).
6. Fu, J. *et al.* Graphitic carbon nitride with dopant induced charge localization for enhanced photoreduction of CO<sub>2</sub> to CH<sub>4</sub>. *Adv. Sci.* **6**, 1900796 (2019).
7. Jiang, Y. *et al.* All-solid-state Z-scheme  $\alpha$ -Fe<sub>2</sub>O<sub>3</sub>/amine-RGO/CsPbBr<sub>3</sub> hybrids for visible light-driven photocatalytic CO<sub>2</sub> reduction. *Chem* **6**, 766-780 (2020).
8. Chen, F. *et al.* Macroscopic spontaneous polarization and surface oxygen vacancies collaboratively boosting CO<sub>2</sub> photoreduction on BiOIO<sub>3</sub> single crystals. *Adv. Mater.* **32**, 1908350 (2020).

9. Bie, C. *et al.* In situ grown monolayer N-doped graphene on CdS hollow spheres with seamless contact for photocatalytic CO<sub>2</sub> reduction. *Adv. Mater.* **31**, 1902868 (2019).
10. Li, X. *et al.* Selective visible-light-driven photocatalytic CO<sub>2</sub> reduction to CH<sub>4</sub> mediated by atomically thin CuIn<sub>5</sub>S<sub>8</sub> layers. *Nat. Energy* **4**, 690-699 (2019).
11. He, L., Zhang, W., Liu, S. & Zhao, Y. Three-dimensional porous N-doped graphitic carbon framework with embedded CoO for photocatalytic CO<sub>2</sub> reduction. *Appl. Catal. B: Environ.* **298**, 120546 (2021).
12. Schukraft, G. E. M. *et al.* Hypercrosslinked polymers as a photocatalytic platform for visible-light-driven CO<sub>2</sub> photoreduction using H<sub>2</sub>O. *ChemSusChem* **14**, 1720-1727 (2021).
13. Wang, L. *et al.* Improved photoreduction of CO<sub>2</sub> with water by tuning the valence band of covalent organic frameworks. *ChemSusChem* **13**, 2973-2980 (2020).
14. Dai, C. *et al.* Triphenylamine based conjugated microporous polymers for selective photoreduction of CO<sub>2</sub> to CO under visible light. *Green Chem.* **21**, 6606-6610 (2019).
15. Xin, Z. *et al.* Rational design of dot-on-rod nanoheterostructure for photocatalytic CO<sub>2</sub> reduction: pivotal role of hole transfer and utilization. *Adv. Mater.* DOI: <https://doi.org/10.1002/adma.202106662>.
16. Wu, X. *et al.* Photocatalytic CO<sub>2</sub> conversion of M<sub>0.33</sub>WO<sub>3</sub> directly from the air with high selectivity: insight into full spectrum-induced reaction mechanism. *J. Am. Chem. Soc.* **141**, 5267-5274 (2019).
17. Yi, L. *et al.* Tungsten bronze Cs<sub>0.33</sub>WO<sub>3</sub> nanorods modified by molybdenum for improved photocatalytic CO<sub>2</sub> reduction directly from air. *Sci. Chin. Mater.* **63**, 2206-2214 (2020).
18. Chen, Y. *et al.* Visible-light-driven conversion of CO<sub>2</sub> from air to CO using an ionic liquid and a conjugated polymer. *Green Chem.* **19**, 5777-5781 (2017).
